# Supplementary material
Source: PubMed Central journal article supplement (PMC1690684)
Supplement: 10983828s01.pdf [file 10983828s01.pdf]

This is an appendix to the paper by Sundström & Boomsma 2000 Reproductive alliances and posthumous fitness enhancement in male ants. *Proc. R. Soc. Lond. B* **267**, 1439–1444.

Electronic appendices are refereed with the text. However, no attempt has been made to impose a uniform editorial style on the electronic appendices.

Appendix A. The number of individuals scored for testing differential mortality between patriline and the results for Fisher's exact test. Colony-wise average values associated with the analysis of paternity skew across cohorts.

| Colony |          | Pupae<br>year 1 | Adults<br>year 2 | C <sup>2</sup> | p     | RA<br>(sd) | Share of majority male |        |      |        | Skew         |        | D      |
|--------|----------|-----------------|------------------|----------------|-------|------------|------------------------|--------|------|--------|--------------|--------|--------|
|        |          |                 |                  |                |       |            | mean<br>(sd)           | min    | max  | CV     | mean<br>(sd) | pool   |        |
| brsk5  | 1 male 1 | 75              | 59               | 0.00           | 0.96  | 2.27       | 0.61                   | 0.27   | 0.83 | 0.43   | 0.64         | 0.52   | 0.22   |
|        | male 2   | 22              | 17               |                |       |            | 0.15                   | 0.26   | 0.08 |        |              |        |        |
| jsk1   | 1 male 1 | 28              | 11               | 1.35           | 0.24  | 2.20       | 0.52                   | 0.00   | 0.88 | 0.46   | 0.60         | 0.50   | 0.20   |
|        | male 2   | 25              | 18               |                |       |            | 0.35                   | 0.24   | 0.18 |        |              |        |        |
|        | 2 male 1 | 40              | 38               | 6.18           | 0.01* |            |                        |        |      |        |              |        |        |
|        | male 2   | 38              | 14               |                |       |            |                        |        |      |        |              |        |        |
| jsk2   | 1 male 1 | only adults     | scored           |                |       | 2.13       | 0.62                   | 0.40   | 0.85 | 0.23   | 0.56         | 0.53   | 0.07   |
|        | male 2   |                 |                  |                |       | 0.17       | 0.14                   |        |      | 0.08   |              |        |        |
| kh4    | 1 male 1 | 23              | 18               | 0.03           | 0.86  | 2.04       | 0.57                   | 0.38   | 0.75 | 0.25   | 0.52         | 0.51   | 0.02   |
|        | male 2   | 14              | 10               |                |       |            | 0.11                   | 0.14   | 0.05 |        |              |        |        |
| msk11  | 1 male 1 | 49              | 62               | 0.44           | 0.50  | 2.08       | 0.52                   | 0.33   | 0.81 | 0.28   | 0.54         | 0.50   | 0.08   |
|        | male 2   | 33              | 34               |                |       |            | 0.13                   | 0.15   | 0.06 |        |              |        |        |
| msk5   | 1 male 1 | 59              | 50               | 1.96           | 0.16  | 2.17       | 0.61                   | 0.32   | 0.89 | 0.31   | 0.59         | 0.52   | 0.12   |
|        | male 2   | 11              | 17               |                |       |            | 0.22                   | 0.19   | 0.11 |        |              |        |        |
| rh1    | 1 male 1 | 25              | 29               | 2.96           | 0.08  | (2.35)     | (0.75)                 | 0.44   | 0.95 | (0.23) | (0.68)       | (0.63) | (0.08) |
|        | male 2   | 5               | 1                |                |       | (0.22)     | (0.17)                 | (0.16) |      |        |              |        |        |
| sh6    | 1 male 1 | 34              | 13               | 0.05           | 0.81  | 2.03       | 0.47                   | 0.34   | 0.58 | 0.19   | 0.52         | 0.50   | 0.03   |
|        | male 2   | 45              | 19               |                |       |            | 0.04                   | 0.09   | 0.06 |        |              |        |        |
| sh7    | 1 male 1 | 34              | 39               | 0.11           | 0.73  | 2.12       | 0.58                   | 0.38   | 0.71 | 0.29   | 0.56         | 0.51   | 0.09   |
|        | male 2   | 55              | 57               |                |       |            | 0.04                   | 0.17   | 0.08 |        |              |        |        |
| Mean** |          |                 |                  |                |       | 2.13       | 0.56                   |        |      | 0.31   | 0.57         | 0.51   | 0.10   |
| sd     |          |                 |                  |                |       | 0.08       | 0.05                   |        |      | 0.09   | 0.04         | 0.01   | 0.07   |

\* not significant after a Bonferroni correction alpha' = 0.005

\*\* Rh 1 excluded
